# Supplementary material for: Brain indoleamine 2,3-dioxygenase contributes to the comorbidity of pain and depression
Source: JCI journal article supplement (doi:10.1172/jci61884), 2012-07-02
Supplement: sd1 [file 1]

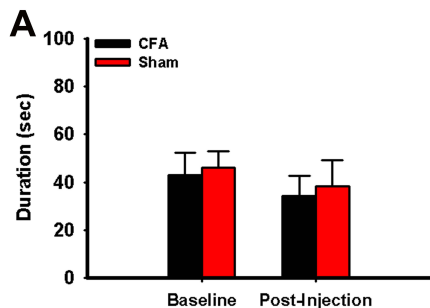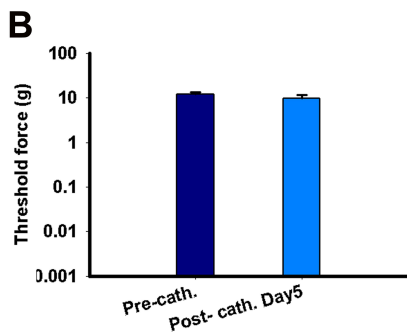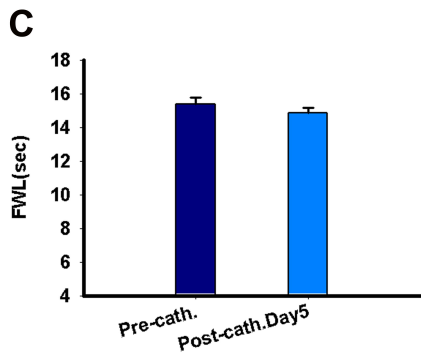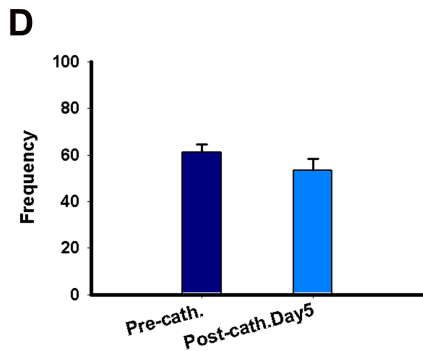

Kim et al.  
Supple. Fig.1

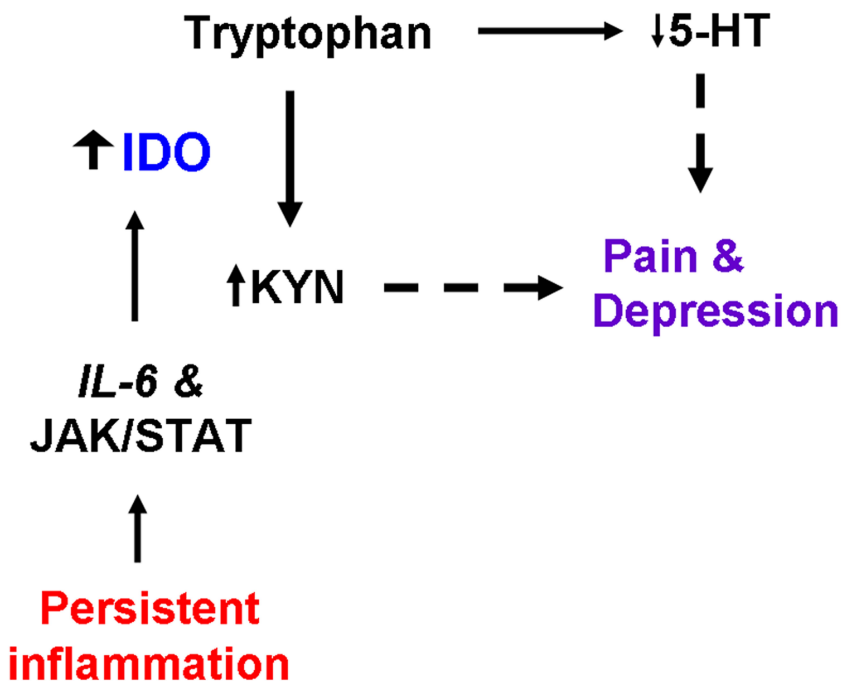

Kim et al.  
Supple. Fig.2

**A**

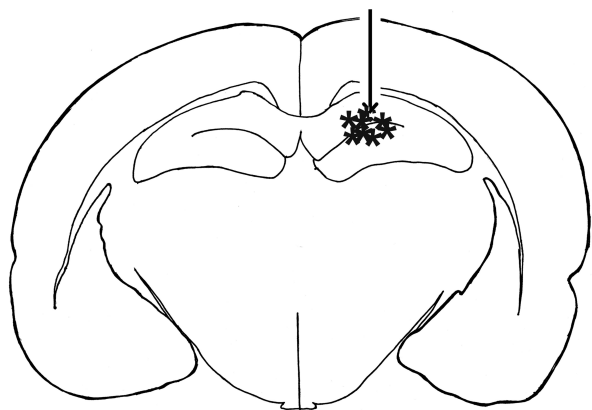

Bregma -3.60mm

**B**

**Negative control**

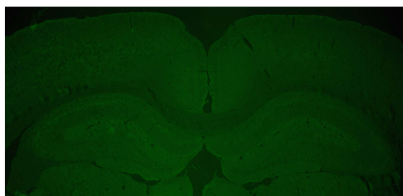

**Ag-Ab absorption**

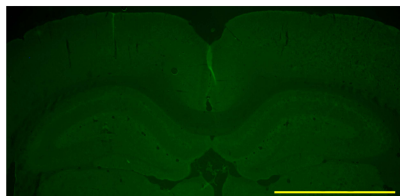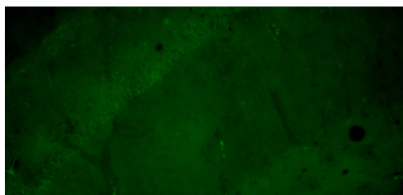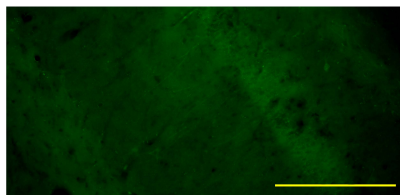

Kim et al.  
Supple. Fig 3

**Supplementary Figure 1:** (A) There were no differences in a Rotarod test (averaged from three 60-second sessions) on day 7 between arthritic and sham rats.  $n=6/\text{group}$ .  $P > 0.05$ . (B-D) Brain cannula implantation did not change baseline responses in nociceptive tests (B, C) and open field test (D) at 5 days after the implantation.

**Supplementary Figure 2:** A flowchart illustrating the role of IL-6-mediated brain IDO expression and enzyme activity in the cellular mechanism underlying the comorbidity between pain and depression.

**Supplementary Figure 3:** (A) Location of microinjections into the hippocampus (AP: -3.6 mm from Bregma; left: +2.0 mm; depth: -4.0 mm). (B) Photomicrographs showing a negative control (left panel: omitting primary antibody) and antigen absorption (right panel) of IDO1 expression. Within each panel, the upper and lower sub-panels represent a low and high magnification photomicrograph of the same brain region. Scale bar, 1.0 mm (upper panel) and 100  $\mu\text{m}$  (lower panel). We also compared the sensitivity of IDO1 antibody from Santa Cruz (Biotechnology Inc. CA; rabbit polyclonal antibody against human, rat, and mouse) and Novus (Novus Biologicals. CO: rabbit polyclonal antibody against mouse and rat). The antibody from Santa Cruz was more sensitive (2-4 times) than the Novus antibody.
